# Supplementary material for: Designing a super broadband near infrared material Mg3Y2Ge3O12:Cr3+ using cation inversion for future light sources
Source: Royal Society of Chemistry journal article supplement (doi:10.1039/d0ra01742f), 2020-01-01
Supplement: d0ra01742f1.pdf [file d0ra01742f1.pdf]

**Design a super broadband near infrared material  $\text{Mg}_3\text{Y}_2\text{Ge}_3\text{O}_{12}:\text{Cr}^{3+}$  using cation inversion  
for future light sources**

Xiangyu Meng<sup>1</sup>, Xiaoshuai Zhang<sup>1</sup>, Xueli Shi<sup>1</sup>, Keliang Qiu<sup>1</sup>, Zhijun Wang<sup>1\*</sup>, Dawei Wang<sup>2</sup>, Jinxin  
Zhao<sup>2</sup>, Xue Li<sup>1</sup>, Zhiping Yang<sup>1</sup>, Panlai Li<sup>1\*</sup>

<sup>1</sup>National-Local Joint Engineering Laboratory of New Energy Photoelectric Devices, Hebei Key  
Laboratory of Optic-electronic Information and Materials, College of Physics Science &  
Technology, Hebei University, Baoding 071002, China

<sup>2</sup>Hebei Key Laboratory of Semiconductor Lighting and Display Critical Materials, Baoding  
071000, China

Table S1 Refinement results of  $\text{Mg}_3\text{Y}_2\text{Ge}_3\text{O}_{12}$

|                                  | <b><math>\text{Mg}_3\text{Y}_2\text{Ge}_3\text{O}_{12}</math> (ICSD<br/>#280049)</b> | <b><math>\text{Mg}_3\text{Y}_2\text{Ge}_3\text{O}_{12}</math></b> |
|----------------------------------|--------------------------------------------------------------------------------------|-------------------------------------------------------------------|
| <b>Space<br/>group</b>           | Ia-3d                                                                                | Ia-3d                                                             |
| <b>Symmetry</b>                  | cubic                                                                                | cubic                                                             |
| <b>a (Å)</b>                     | 12.2489                                                                              | 12.2158                                                           |
| <b>b (Å)</b>                     | 12.2489                                                                              | 12.2158                                                           |
| <b>c (Å)</b>                     | 12.2489                                                                              | 12.2158                                                           |
| <b>V (Å<sup>3</sup>)</b>         | 1837.77                                                                              | 1822.921                                                          |
| <b><math>\alpha</math> (deg)</b> | 90                                                                                   | 90                                                                |
| <b><math>\beta</math> (deg)</b>  | 90                                                                                   | 90                                                                |
| <b><math>\gamma</math> (deg)</b> | 90                                                                                   | 90                                                                |
| <b>Rp</b>                        |                                                                                      | 8.59%                                                             |
| <b>Rwp</b>                       |                                                                                      | 11.58%                                                            |
| <b><math>\chi^2</math></b>       |                                                                                      | 1.428                                                             |

\*wangzj1998@126.com

\*li\_panlai@126.com

Table S2 The atomic positions of  $\text{Mg}_3\text{Y}_2\text{Ge}_3\text{O}_{12}:\text{xCr}^{3+}$  ( $x=0.01, 0.03, 0.05, 0.07$ ) composition obtained from the Rietveld refinement results

| MYG: $\text{xCr}^{3+}$ |       | x       | y      | z      |
|------------------------|-------|---------|--------|--------|
| x=0.01                 | Mg1/Y | 0       | 0.25   | 0.125  |
|                        | Mg2   | 0       | 0      | 0      |
|                        | Ge    | 0       | 0.25   | 0.375  |
|                        | O     | -0.0314 | 0.0559 | 0.1560 |
| x=0.03                 | Mg1/Y | 0       | 0.25   | 0.125  |
|                        | Mg2   | 0       | 0      | 0      |
|                        | Ge    | 0       | 0.25   | 0.375  |
|                        | O     | -0.0311 | 0.0559 | 0.1572 |
| x=0.05                 | Mg1/Y | 0       | 0.25   | 0.125  |
|                        | Mg2   | 0       | 0      | 0      |
|                        | Ge    | 0       | 0.25   | 0.375  |
|                        | O     | -0.0310 | 0.0560 | 0.1570 |
| x=0.07                 | Mg1/Y | 0       | 0.25   | 0.125  |
|                        | Mg2   | 0       | 0      | 0      |
|                        | Ge    | 0       | 0.25   | 0.375  |
|                        | O     | -0.0316 | 0.0552 | 0.1572 |

Table S3 The atomic positions of  $\text{Mg}_3\text{Y}_2\text{Ge}_3\text{O}_{12}:\text{xCr}^{3+}$  ( $x=0.10, 0.20, 0.30, 0.40$ ) composition obtained from the Rietveld refinement results

| MYG: $\text{xCr}^{3+}$ |       | x       | y      | z      |
|------------------------|-------|---------|--------|--------|
| x=0.10                 | Mg1/Y | 0       | 0.25   | 0.125  |
|                        | Mg2   | 0       | 0      | 0      |
|                        | Ge    | 0       | 0.25   | 0.375  |
|                        | O     | -0.0318 | 0.0555 | 0.1572 |
| x=0.20                 | Mg1/Y | 0       | 0.25   | 0.125  |
|                        | Mg2   | 0       | 0      | 0      |
|                        | Ge    | 0       | 0.25   | 0.375  |
|                        | O     | -0.0319 | 0.0559 | 0.1569 |
| x=0.30                 | Mg1/Y | 0       | 0.25   | 0.125  |
|                        | Mg2   | 0       | 0      | 0      |
|                        | Ge    | 0       | 0.25   | 0.375  |
|                        | O     | -0.0302 | 0.0557 | 0.1559 |
| x=0.40                 | Mg1/Y | 0       | 0.25   | 0.125  |
|                        | Mg2   | 0       | 0      | 0      |
|                        | Ge    | 0       | 0.25   | 0.375  |
|                        | O     | -0.0302 | 0.0554 | 0.1570 |

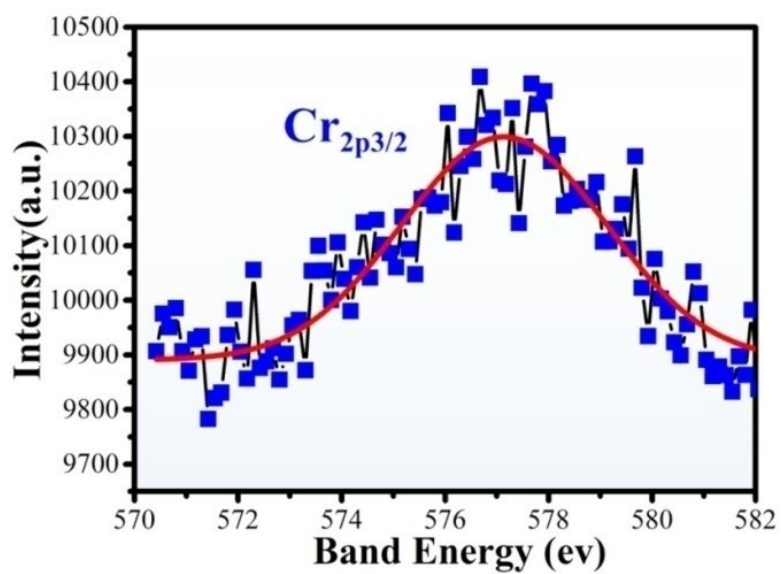

Figure S1 The XPS spectrum of MYG:0.03Cr<sup>3+</sup>.

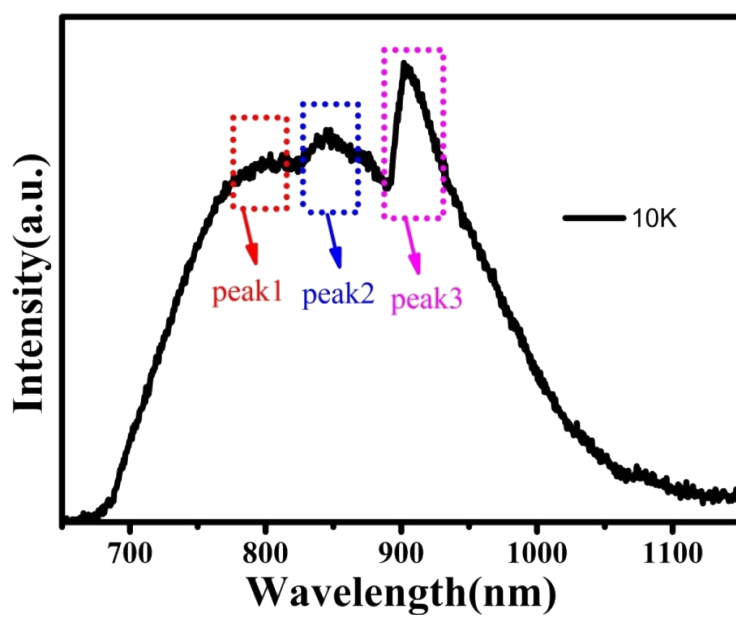

Figure S2 The emission spectrum of MYG:0.03Cr<sup>3+</sup> at 10K.

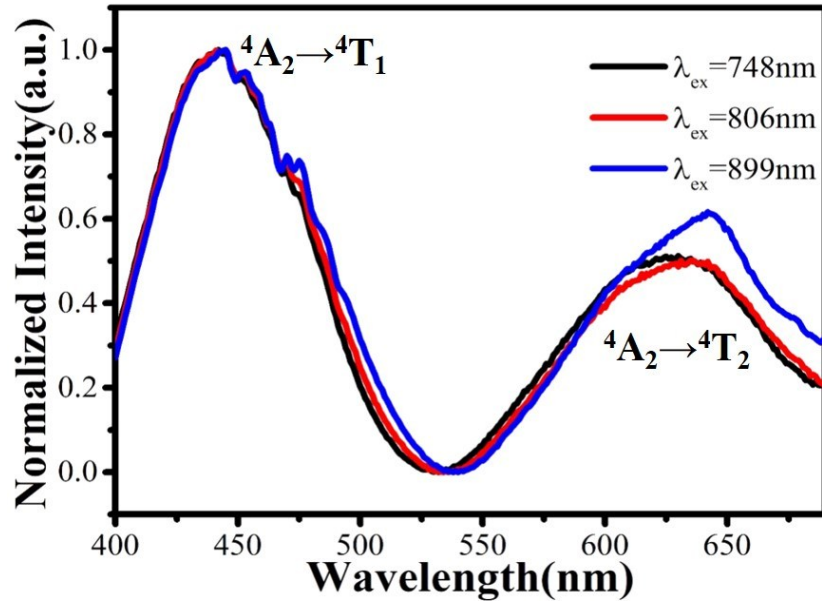

Figure S3 The excitation spectra of MYG:0.03Cr<sup>3+</sup> monitoring the peaks at 748nm, 806nm and 899nm, respectively.

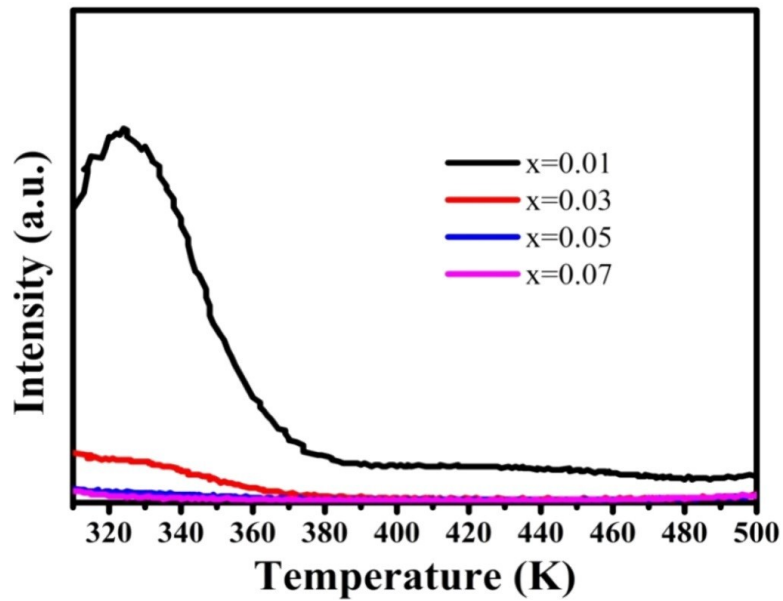

Figure S4 TL spectra of MYG:xCr<sup>3+</sup> (x=0.01, 0.03, 0.05, 0.07).

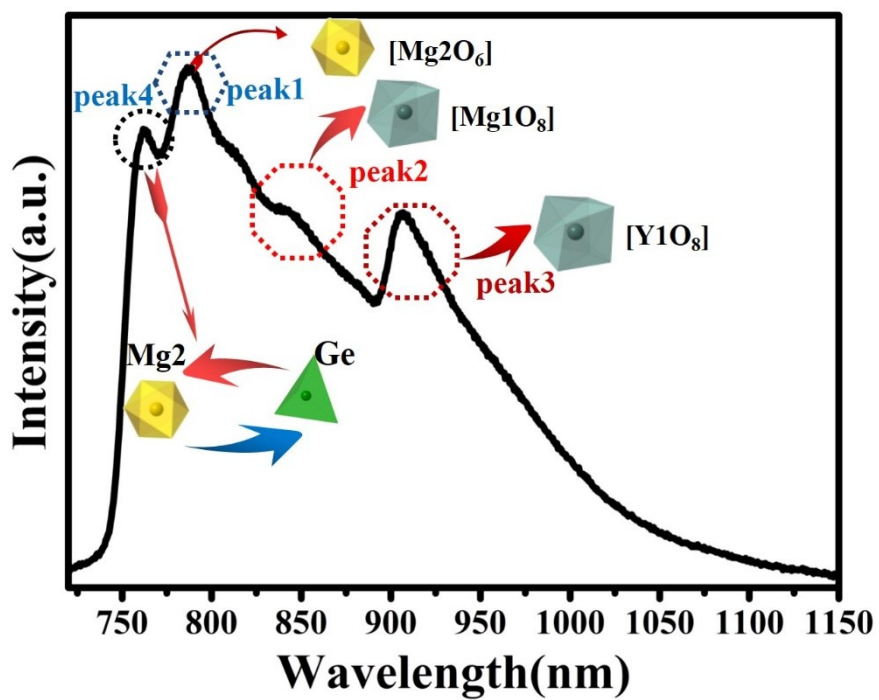

Figure S5 The emission spectrum of MYG:0.30Cr<sup>3+</sup> at 10K.
